# Supplementary material
Source: ML conference proceedings conference paper supplement (https://proceedings.mlr.press/v84/narasimhan18a.html)
Supplement: Supplementary file [file narasimhan18a-supp.pdf]

# Learning with Complex Loss Functions and Constraints

Harikrishna Narasimhan

Institute for Applied Computational Science, SEAS, Harvard University, Cambridge, MA 02138, USA

## Appendix

### A Proofs

#### A.1 Proof of Theorem 1

**Theorem** (Regret Bound for COCO (Restated)). *For any  $\delta \in (0, 1]$ , let the following hold w.p.  $\geq 1 - \delta$  (over  $S \sim D^m$ ): for each iteration  $t \in [T]$ , the Frank-Wolfe algorithm satisfies  $\mathcal{L}(\widehat{C}^t, \lambda^t) \leq \min_{C \in \mathcal{C}_D} \mathcal{L}(C, \lambda^t) + \theta(\delta, m)$ , and  $\|C^D[\widehat{h}^t] - \widehat{C}^t\|_\infty \leq \xi(\delta, m)$ , where  $\theta, \xi : (0, 1] \times \mathbb{N} \rightarrow \mathbb{R}_+$ . Let parameter  $B$  be s.t.  $B \geq 2 \max_{k \in [K]} \lambda_k^*$ . Let  $\bar{h} : \mathcal{X} \rightarrow \Delta_n$  be the classifier obtained after  $T = \tau m$  iterations, for some  $\tau \in \mathbb{N}$ . Then w.p.  $\geq 1 - \delta$  (over  $S \sim D^m$ ):*

$$L(\bar{h}) \leq L(h^*) + \frac{KB^2 + 2KR^2}{2\sqrt{\tau m}} + \theta(\delta, m) + G\xi(\delta, m)$$

and  $\forall k \in [K]$ ,

$$g_k(\bar{h}) \leq \epsilon_k + \frac{2}{B} \left( \frac{KB^2 + 2KR^2}{2\sqrt{\tau m}} + \theta(\delta, m) \right) + G\xi(\delta, m).$$

For ease of presentation, we will work with constraints of the form  $\phi_k(C) \leq 0$ , with the constant  $\epsilon_k$  absorbed into  $\phi_k$ . We will find it useful to prove the following lemma:

**Lemma 5.** *For any  $\delta \in (0, 1]$ , w.p.  $\geq 1 - \delta$ ,*

$$\max_{\lambda \in [0, B]^\kappa} \mathcal{L}(\bar{C}, \lambda) - \min_{C \in \mathcal{C}_D} \mathcal{L}(C, \bar{\lambda}) \leq \frac{KB^2 + 2KR^2}{2\sqrt{T}} + \theta(\delta, m)$$

*Proof.* Following standard online gradient ascent analysis to the sequence of functions  $\mathcal{L}(C^1, \lambda), \dots, \mathcal{L}(\widehat{C}^t, \lambda)$  linear in  $\lambda$ , we get after  $T$  iterations:

$$\max_{\lambda \in [0, B]^\kappa} \frac{1}{T} \sum_{t=1}^T \mathcal{L}(\widehat{C}^t, \lambda) - \frac{1}{T} \sum_{t=1}^T \mathcal{L}(\widehat{C}^t, \lambda^t) \leq \frac{KB^2 + 2KR^2}{2\sqrt{T}} \quad (3)$$

where we use the fact that  $\|\lambda\|_2^2 \leq KB^2$  and  $\mathcal{L}$  is Lipschitz in  $\lambda$  w.r.t.  $\ell_2$  norm with parameter  $\sqrt{KR}$ . We then have

$$\begin{aligned} \max_{\lambda \in [0, B]^\kappa} \mathcal{L}(\bar{C}, \lambda) - \min_{C \in \mathcal{C}_D} \mathcal{L}(C, \bar{\lambda}) &= \max_{\lambda \in [0, B]^\kappa} \mathcal{L}(\bar{C}, \lambda) - \min_{C \in \mathcal{C}_D} \mathcal{L}(C, \bar{\lambda}) \\ &\leq \max_{\lambda \in [0, B]^\kappa} \frac{1}{T} \sum_{t=1}^T \mathcal{L}(\widehat{C}^t, \lambda) - \min_{C \in \mathcal{C}_D} \frac{1}{T} \sum_{t=1}^T \mathcal{L}(C, \lambda^t) \\ &\leq \max_{\lambda \in [0, B]^\kappa} \frac{1}{T} \sum_{t=1}^T \mathcal{L}(\widehat{C}^t, \lambda) - \frac{1}{T} \sum_{t=1}^T \min_{C \in \mathcal{C}_D} \mathcal{L}(C, \lambda^t) \\ &\leq \max_{\lambda \in [0, B]^\kappa} \frac{1}{T} \sum_{t=1}^T \mathcal{L}(\widehat{C}^t, \lambda) - \frac{1}{T} \sum_{t=1}^T \mathcal{L}(\widehat{C}^t, \lambda^t) + \theta(\delta, m) \\ &\leq \frac{KB^2 + 2KR^2}{2\sqrt{T}} + \theta(\delta, m), \end{aligned}$$

where the last two statement holds w.p.  $\geq 1 - \delta$ . Here the first step follows from  $\mathcal{L}$  being linear in  $\lambda$  and being convex in  $C$ . The fourth step follows from the Frank-Wolfe guarantee. The last step follows from (3).  $\square$

We are now ready to prove Theorem 1.

*Proof of Theorem 1.* Let  $(C^*, \lambda^*)$  denote an optimal solution to (OP3). Recall that  $C^*$  satisfies the constraints of the primal problem, i.e.  $g(C^*) \leq 0$ , and by our assumption about  $B$ ,  $\lambda^* \in [0, B]^K$ . We get immediately from Lemma 5 w.p.  $\geq 1 - \delta$ ,

$$\begin{aligned} \mathcal{L}(C^*, \lambda^*) &= \max_{\lambda \in [0, B]^K} \min_{C \in \mathcal{C}_D} \mathcal{L}(C, \lambda) \geq \min_{C \in \mathcal{C}_D} \mathcal{L}(C, \bar{\lambda}) \\ &\geq \max_{\lambda \in [0, B]^K} \mathcal{L}(\bar{C}, \lambda) - \frac{KB^2 + 2KR^2}{2\sqrt{T}} - \theta(\delta, m) \\ &\geq \mathcal{L}(\bar{C}, \lambda') - \frac{KB^2 + 2KR^2}{2\sqrt{T}} - \theta(\delta, m), \end{aligned} \quad (4)$$

where the inequality in the last line holds for any value of  $\lambda' \in [0, B]^K$ .

Setting  $\lambda' = \mathbf{0}$  in (4), we have w.p.  $\geq 1 - \delta$

$$\begin{aligned} \psi(\bar{C}) &\leq \psi(C^*) + \sum_{k=1}^K \lambda_k^* \phi_k(C^*) + \frac{KB^2 + 2KR^2}{2\sqrt{T}} + \theta(\delta, m) \\ &\leq \psi(C^*) + \frac{KB^2 + 2KR^2}{2\sqrt{T}} + \theta(\delta, m), \end{aligned} \quad (5)$$

where the last inequality uses the fact that  $\phi_k(C^*) \leq 0$ .

Since  $C^D[\bar{h}] = \frac{1}{T} \sum_{t=1}^T C^D[h^t]$ , we have:

$$\|C^D[\bar{h}] - \bar{C}\|_1 \leq \frac{1}{T} \|C^D[h^t] - \hat{C}^t\|_1 \leq \xi(\delta, m) \quad (6)$$

where the last inequality holds w.p. at least  $1 - \delta$  for all  $t \in [T]$ .

It follows from (5) and (6),

$$\begin{aligned} L(\bar{h}) &= \psi(C^D[\bar{h}]) \leq \psi(\bar{C}) + G\xi(\delta, m) \\ &\leq \psi(C^*) + \frac{KB^2 + 2KR^2}{2\sqrt{T}} + \theta(\delta, m) + G\xi(\delta, m) \\ &= L(h^*) + \frac{KB^2 + 2KR^2}{2\sqrt{T}} + \theta(\delta, m) + G\xi(\delta, m) \end{aligned}$$

For a given  $k \in [K]$ , setting  $\lambda'_k = \lambda_k^* + B/2$  and  $\lambda'_j = \lambda_j^*$  for each  $j \neq k$  in (4) (note  $\lambda' \in [0, B]^K$ ), we have w.p.  $\geq 1 - \delta$

$$\begin{aligned} \mathcal{L}(C^*, \lambda^*) &\geq \psi(\bar{C}) + \sum_{k=1}^K \lambda_k^* \phi_k(\bar{C}) + \frac{B}{2} \phi_k(\bar{C}) - \frac{KB^2 + 2KR^2}{2\sqrt{T}} - \theta(\delta, m) \\ &\geq \min_{C \in \mathcal{C}_D} \left\{ \psi(C) + \sum_{k=1}^K \lambda_k^* \phi_k(C) \right\} + \frac{B}{2} \phi_k(\bar{C}) - \frac{KB^2 + 2KR^2}{2\sqrt{T}} - \theta(\delta, m) \\ &= \mathcal{L}(C^*, \lambda^*) + \frac{B}{2} \phi_k(\bar{C}) - \frac{KB^2 + 2KR^2}{2\sqrt{T}} - \theta(\delta, m). \end{aligned}$$

This gives us that for each  $k \in [K]$

$$\phi_k(\bar{C}) \leq \frac{2}{B} \left( \frac{KB^2 + 2KR^2}{2\sqrt{T}} + \theta(\delta, m) \right). \quad (7)$$

It follows from (7) and (6),  $\forall k \in [K]$  :

$$\begin{aligned} g_k(\bar{h}) &\leq \phi_k(C^D[\bar{h}]) \leq \phi_k(\bar{C}) + G\xi(\delta, m) \\ &\leq \frac{2}{B} \left( \frac{KB^2 + 2KR^2}{2\sqrt{T}} + \theta(\delta, m) \right) + G\xi(\delta, m). \end{aligned}$$

Setting  $T = \tau m$  completes the proof.  $\square$

## A.2 Proof of Theorem 3

**Theorem** (Regret Bound for FRACO (Restated)). *Let  $f'(C) \geq b, \forall C \in \mathcal{C}_D$  for  $b > 0$ . For any  $\delta \in (0, 1]$ , w.p.  $\geq 1 - \delta$ , in each iteration  $t \in [T]$ , the COCO step satisfies:  $f(\widehat{C}^t) - \gamma^t f'(\widehat{C}^t) \leq \min_{C \in \mathcal{C}_D} f(C) - \gamma^t f'(C) + \theta(\delta, m)$ , with each  $\phi_k(\widehat{C}^t) \leq \epsilon_k + \theta'(\delta, m)$ , and  $\|C^D[h^t] - \widehat{C}^t\|_\infty \leq \xi(\delta, m)$ . Let  $\bar{h}$  be the classifier returned after  $T = \tau m$  iterations. Then for any  $\delta \in (0, 1]$ , w.p.  $\geq 1 - \delta$  (over  $S \sim D^m$ ),*

$$L(\bar{h}) \leq L(h^*) + 2\theta(\delta, m)/b + 2G\xi(\delta, m)/b + 2^{-\tau m}R \quad \text{and} \quad g_k(\bar{h}) \leq \epsilon_k + \theta'(\delta, m), \forall k \in [K].$$

We will find the following lemma useful.

**Lemma 6.** *At each iteration  $t \in [T]$  of the FRACO, w.p.  $\geq 1 - \delta$ :*

$$L(h^*) \geq \alpha^t - \frac{1}{b}\theta(\delta, m) \quad \text{and} \quad L(h^t) \leq \beta^t + \frac{1}{b}\theta(\delta, m) + \frac{2G}{b}\xi(\delta, m)$$

*Proof.* We will use mathematical induction on the iteration number  $t$ . For  $t = 0$ , the invariant holds trivially:  $L(h^*) \geq \alpha_0 = 0$  and  $L(h^0) \leq \beta_0 = R$ . Let us assume that the invariant holds at iteration  $t - 1$ . We shall show that the invariant holds at iteration  $t$ .

For ease of presentation, henceforth, we will not explicitly qualify statements as holding with high probability. We consider two cases in line 6 of FRACO: (a)  $\psi(\widehat{C}^t) \leq \gamma^t$  and (b)  $\psi(\widehat{C}^t) > \gamma^t$ .

Case (a): Here,  $\psi(\widehat{C}^t) \leq \gamma^t$ , leading to  $\alpha^t = \alpha^{t-1}$ ,  $\beta^t = \gamma^t$  and  $h^t = \widehat{h}$ . From our assumption that the invariant holds in iteration  $t - 1$ , we have

$$L(h^*) \geq \alpha^{t-1} - \frac{1}{b}\theta(\delta, m) = \alpha^t - \frac{1}{b}\theta(\delta, m).$$

We also have:

$$\begin{aligned} f(C^t) - \gamma^t f'(C^t) &\leq f(\widehat{C}^t) - \gamma^t f'(\widehat{C}^t) + 2G\xi(\delta, m) \\ &\leq \min_{C \in \mathcal{C}_D} \{f(C) - \gamma^t f'(C)\} + \theta(\delta, m) + 2G\xi(\delta, m) \\ &\leq f(\widehat{C}^t) - \gamma^t f'(\widehat{C}^t) + \theta(\delta, m) + 2G\xi(\delta, m) \\ &= f'(\widehat{C}^t)(\psi(\widehat{C}^t) - \gamma^t) + \theta(\delta, m) + 2G\xi(\delta, m) \\ &\leq 0 + \theta(\delta, m) + 2G\xi(\delta, m), \end{aligned}$$

where the first two steps uses the guarantee on COCO.

The above inequality then gives us:

$$\begin{aligned} \frac{f(C^t)}{f'(C^t)} &\leq \gamma^t + \frac{\theta(\delta, m)}{f'(C^t)} + \frac{2G}{f'(C^t)}\xi(\delta, m) \\ &\leq \gamma^t + \frac{1}{b}\theta(\delta, m) + \frac{2G}{b}\xi(\delta, m), \end{aligned}$$

which follows from  $f'(C^t) \geq b$ . Thus  $\psi(C^D[h^t]) \leq \gamma^t + \frac{1}{b}\theta(\delta, m) + \frac{2G}{b}\xi(\delta, m) = \beta^t + \frac{1}{b}\theta(\delta, m) + \frac{2G}{b}\xi(\delta, m)$ .

Case (b): Here  $\psi(\widehat{C}^t) > \gamma^t$ , leading to  $\alpha^t = \gamma^t$ ,  $\beta^t = \beta^{t-1}$  and  $h^t = h^{t-1}$ . We then have from the guarantee on COCO:

$$\begin{aligned} \min_{C \in \mathcal{C}_D} f(C) - \gamma^t f'(C) &> f(\widehat{C}^t) - \gamma^t f'(\widehat{C}^t) - \theta(\delta, m) \\ &\geq f'(\widehat{C}^t)(\psi(\widehat{C}^t) - \gamma^t) - \theta(\delta, m) \\ &\geq 0 - \theta(\delta, m). \end{aligned}$$

The above inequality then gives us for all  $C \in \mathcal{C}_D$ ,

$$\frac{f(C)}{f'(C)} \geq \gamma^t - \frac{\theta(\delta, m)}{f'(C)}$$

$$\geq \gamma^t - \frac{1}{b} \theta(\delta, m).$$

Thus  $\min_{C \in \mathcal{C}_D} \psi(C) > \gamma^t - \frac{1}{b} \theta(\delta, m) = \alpha^t - \frac{1}{b} \theta(\delta, m)$ .

Further, by our assumption that the invariant holds at iteration  $t - 1$ , we have

$$L(h^t) \leq \beta^{t-1} + \frac{1}{b} \theta(\delta, m) + \frac{2G}{b} \xi(\delta, m) = \beta^t + \frac{1}{b} \theta(\delta, m) + \frac{2G}{b} \xi(\delta, m).$$

□

We are now ready to prove the theorem.

*Proof of Theorem 3.* It is easy to show that at each iteration  $t$ :

$$\beta^t - \alpha^t = \frac{1}{2}(\beta^{t-1} - \alpha^{t-1}) \quad (8)$$

Then from Lemma 6 we have,

$$\begin{aligned} L(\bar{h}) - L(h^*) &= L(h^T) - L(h^*) \\ &\leq \beta^T - \alpha^T + \frac{2}{b} \theta(\delta, m) + \frac{2G}{b} \xi(\delta, m) \\ &\leq 2^{-T}(\beta^0 - \alpha^0) + \frac{2}{b} \theta(\delta, m) + \frac{2G}{b} \xi(\delta, m) \\ &= 2^{-T}R + \frac{2}{b} \theta(\delta, m) + \frac{2G}{b} \xi(\delta, m). \end{aligned}$$

From the guarantee for the COCO method, we have that  $g_k(\bar{h}) \leq \theta'(\delta, m)$ ,  $\forall k \in [K]$ . □

### A.3 Regret Bound for Frank-Wolfe Algorithm under Fairness Constraints

We outline the variant of the COCO and FrankWolfe algorithm for a setting with fairness constraints in Algorithm 4 and 5. Here for any  $u \in [M]$ , we use  $\text{conf}_u(h, S) \in [0, 1]^{n \times n}$  to denote the *empirical* confusion matrix for a classifier  $h$  conditioned on  $A = u$ , from sample  $S$ :

$$[\text{conf}_u(h, S)]_{ij} = \frac{\sum_{k=1}^m \mathbf{1}(y_k = i, h(x_k) = j, a_k = u)}{\sum_{k=1}^m \mathbf{1}(a_k = u)}.$$

The following regret bound holds for the fair variant of the Frank-Wolfe algorithm.

**Theorem 7 (Regret Bound for FairFrankWolfe).** *Let  $\psi, \phi_1, \dots, \phi_K([0, 1]^{n \times n})^M \rightarrow \mathbb{R}_+$  be  $G$ -Lipschitz and  $\beta$ -smooth in  $(C^1, \dots, C^M)$  w.r.t. the  $\ell_1$ . Let  $\hat{\eta}: \mathcal{X} \times [M] \rightarrow \Delta_n$  be the conditional class probability model used to construct the plug-in classifier for the cost-sensitive learner in line 6 of the FairFrankWolfe. Given  $\lambda \in [0, B]^K$ , let  $(\hat{C}^1, \dots, \hat{C}^M, \hat{h})$  be returned by the algorithm after  $\kappa m$  iterations for some  $Q = \kappa \in \mathbb{N}$ . Let  $C^a = C^{D^a}[\hat{h}]$ . Then for any  $\delta \in (0, 1]$ , w.p.  $\geq 1 - \delta$  (over  $S \sim D^m$ )*

$$\begin{aligned} &\mathcal{L}(\hat{C}^1, \dots, \hat{C}^M, \lambda) - \min_{(C^1, \dots, C^M) \in \mathcal{C}_D} \mathcal{L}(C^1, \dots, C^M, \lambda) \\ &\leq \frac{4G(1 + KB)}{\pi_{\min}} \mathbf{E}_{X, A} [\|\hat{\eta}(X, A) - \eta(X, A)\|_1] + 4\sqrt{2}\beta(1 + KB)n^2 \sum_{a=1}^M \|C^a - \hat{C}\|_{\infty} + \frac{8\beta(1 + KB)}{\kappa m + 2}, \end{aligned}$$

and  $\forall a \in [M]$ ,

$$\|C^a - \hat{C}\|_{\infty} \leq \nu \sqrt{\frac{n^2 \log(n) \log(m) + \log(n^2 M / \delta)}{m}},$$

where  $\pi_{\min} = \min_{a \in [M]} \pi_a$  and  $\nu > 0$  is a distribution-independent constant.

**Algorithm 4** COCO-fair: Algorithm for Convex Losses with Convex Fairness Constraints

- 1: **Input:**  $\psi, \phi_1, \dots, \phi_K : ([0, 1]^{n \times n})^M \rightarrow \mathbb{R}_+$   
 $S = ((x_1, y_1, a_1), \dots, (x_m, y_m, a_m))$
- 2: **Initialize:**  $\lambda^0 = 0^K, \eta_0 > 0$
- 3: **For**  $t = 1$  **to**  $T = \tau m$  **do**
- 4:  $(\widehat{C}^{1,t}, \dots, \widehat{C}^{M,t}, \widehat{h}^t) \leftarrow \text{FairFrankWolfe}(\psi, \phi_1, \dots, \phi_K, \lambda^{t-1}, S)$
- 5:  $\lambda_k^t = \Pi_{[0, B]} \left( \lambda_k^{t-1} + \frac{\eta_0}{\sqrt{t}} \left( \phi_k(\widehat{C}^{1,t}, \dots, \widehat{C}^{M,t}) - \epsilon_k \right) \right), \forall k$
- 6: **End For**
- 7: **Output:** Classifier  $\widehat{h} : \mathcal{X} \times [M] \rightarrow \Delta_n$  that for any  $x \in \mathcal{X}$  and  $a \in [M]$  outputs  $\widehat{h}^t(x, a)$  with probability  $\frac{1}{T}$

**Algorithm 5** FairFrankWolfe: Algorithm for convex objective for the setting with fairness constraints

- 1: **Input:**  $\psi, \phi_1, \dots, \phi_K : ([0, 1]^{n \times n})^M \rightarrow \mathbb{R}_+, \lambda \in \mathbb{R}_+^n$   
 $S = ((x_1, y_1, a_1), \dots, (x_m, y_m, a_m))$
- 2: Split  $S$  into  $S_1$  and  $S_2$  with sizes  $\lceil \frac{m}{2} \rceil$  and  $\lfloor \frac{m}{2} \rfloor$
- 3:  $\Gamma^{a,0} = \text{conf}_a(H^0, S_1), \forall a \in [M]$  for some  $H^0 : \mathcal{X} \rightarrow \Delta_n$
- 4: **For**  $r = 1$  **to**  $Q$  **do**
- 5:  $W^a = \nabla_{C^a} \psi(\Gamma^{1,r-1}, \dots, \Gamma^{M,r-1}) + \sum_{k=1}^K \lambda_k \nabla_{C^a} \phi_k(\Gamma^{1,r-1}, \dots, \Gamma^{M,r-1}), \forall a \in [M]$
- 6:  $H^r = \text{cost-sensitive}(W^1, \dots, W^M, S_2)$
- 7:  $\Gamma^{a,r} = \left(1 - \frac{2}{r+1}\right) \Gamma^{a,r-1} + \frac{2}{r+1} \text{conf}_a(H^r, S_1), \forall a \in [M]$
- 8: **End For**
- 9: **Output:**  $\widehat{C}^1 = \Gamma^{1,R}, \dots, \widehat{C}^M = \Gamma^{M,R}$ , Classifier  $\widehat{h} : \mathcal{X} \times [M] \rightarrow \Delta_n$  that for  $x \in \mathcal{X}$  and  $a \in [M]$  outputs  $H^r(x, a)$  with probability  $\frac{2}{r+1} \prod_{s=r+1}^R \left(1 - \frac{2}{s+1}\right)$

It is clear from the above theorem that when sample size  $m \rightarrow \infty$ , FairFrankWolfe method converges to the optimal objective value, provided  $\mathbf{E}_X[\|\widehat{\eta}(X) - \eta(X)\|_1] \rightarrow 0$  as  $m \rightarrow \infty$ . The proof of the theorem follows the same progression as Theorem 16 in [26], except for the following lemmas.

**Lemma 8** (Uniform convergence of confusion matrices). *Let  $\eta : \mathcal{X} \times [M] \rightarrow \Delta_n$  and let  $\mathcal{H}_\eta$  be the set of (deterministic) classifiers  $h : \mathcal{X} \times [M] \rightarrow [n]$  that satisfy  $h(x, a) = \text{argmin}_{j \in [n]} \sum_{i=1}^n \eta_i(x, a) L_{ij}^a$  for some  $\mathbf{L}^1, \dots, \mathbf{L}^M \in [0, 1]^{n \times n}$ . For any  $\delta \in (0, 1]$ , w.p.  $\leq 1 - \delta$  (over draw of  $S \sim D^m$ ),  $\forall a \in [M]$ ,*

$$\sup_{h \in \mathcal{H}_\eta} \|C^{D^a}[h] - \text{conf}_a(h, S)\|_\infty \leq \nu \sqrt{\frac{n^2 \log(n) \log(m) + \log(n^2 M / \delta)}{m}},$$

where  $\nu > 0$  is a distribution-independent constant.

The proof of the above lemma follows by applying the uniform convergence result in [26] (see Lemma 15) for each  $a \in [M]$ , and taking a union bound over the  $M$  events. The next lemma bounds the regret of a plug-in classifier.

**Lemma 9** (Regret of plug-in classifier). *For fixed  $\mathbf{L}^1, \dots, \mathbf{L}^M \in [0, 1]^{n \times n}$  define loss function  $L[h] = \sum_{a=1}^M \langle \mathbf{L}^a, C^{D^a}[\widehat{h}] \rangle$ . Then the following classifier is optimal for  $L$ :*

$$h^*(x, a) = \text{argmin}_{j \in [n]}^* \sum_{i=1}^n \eta_i(x, a) L_{ij}^a.$$

Moreover, given a class probability estimation model  $\widehat{\eta} : \mathcal{X} \times [M] \rightarrow \Delta_n$ , define a classifier:

$$\widehat{h}(x, a) = \text{argmin}_{j \in [n]} \sum_{i=1}^n \widehat{\eta}_i(x, a) L_{ij}^a.$$

Then the following is a bound on the regret of  $\widehat{h}$ :

$$L(\widehat{h}) - L(h^*) \leq \frac{1}{\pi_{\min}} \mathbf{E}_{X, A} [\|\widehat{\eta}(X, A) - \eta(X, A)\|_1],$$

where  $\pi_{\min} = \min_{a \in [M]} \pi_a$ .

*Proof.* Let  $\ell_j^a = [L_{1,j}^a, \dots, L_{n,j}^a]$ . We first show that  $h^*$  optimizes  $L$ :

$$\begin{aligned} \langle \mathbf{L}^a, C^{D_a}[h] \rangle &= \sum_{j=1}^n \mathbf{P}[Y = i, h(X, a) = j \mid A = a] L_{ij}^a \\ &= \mathbf{E} \left[ \sum_{j=1}^n \eta_i(X, a) L_{i,h(X,a)}^a \mid A = a \right] \\ &= \mathbf{E} \left[ \eta(X, a)^\top \ell_{h(X,a)}^a \mid A = a \right]. \end{aligned}$$

We then have

$$\begin{aligned} L(h^*) &= \sum_{a=1}^M \mathbf{E} \left[ \eta(X, a)^\top \ell_{h^*(X,a)}^a \mid A = a \right] \\ &= \sum_{a=1}^M \mathbf{E} \left[ \min_{j \in [n]} \eta(X, a)^\top \ell_j^a \mid A = a \right] \\ &\leq \sum_{a=1}^M \mathbf{E} \left[ \eta(X, a)^\top \ell_{h(X,a)}^a \mid A = a \right] = L(h), \end{aligned}$$

where the last statement holds for any classifier  $h : \mathcal{X} \times [M] \rightarrow \Delta_n$ . Thus  $h^* \in \operatorname{argmin}_{h: \mathcal{X} \rightarrow \Delta_n} L(h)$ .

We next prove the regret bound for  $\hat{h}$ :

$$\begin{aligned} L(\hat{h}) - L(h^*) &= \sum_{a=1}^M \mathbf{E} [\eta(X, a)^\top \ell_{\hat{h}(X,a)}^a \mid A = a] - \sum_{a=1}^M \mathbf{E} [\eta(X, a)^\top \ell_{h^*(X,a)}^a \mid A = a] \\ &= \sum_{a=1}^M \mathbf{E} [\hat{\eta}(X, a)^\top \ell_{\hat{h}(X,a)}^a + (\eta(X, a) - \hat{\eta}(X, a))^\top \ell_{\hat{h}(X,a)}^a + \eta(X, a)^\top \ell_{h^*(X,a)}^a \mid A = a] \\ &\leq \sum_{a=1}^M \mathbf{E} [\hat{\eta}(X, a)^\top \ell_{h^*(X,a)}^a + (\eta(X, a) - \hat{\eta}(X, a))^\top \ell_{\hat{h}(X,a)}^a - \eta(X, a)^\top \ell_{h^*(X,a)}^a \mid A = a] \\ &= \sum_{a=1}^M \mathbf{E} [(\eta(X, a) - \hat{\eta}(X, a))^\top (\ell_{\hat{h}(X,a)}^a - \ell_{h^*(X,a)}^a) \mid A = a] \\ &\leq \sum_{a=1}^M \mathbf{E} [\|\eta(X, a) - \hat{\eta}(X, a)\|_1 \cdot \|\ell_{\hat{h}(X,a)}^a - \ell_{h^*(X,a)}^a\|_\infty \mid A = a] \\ &\leq \sum_{a=1}^M \mathbf{E} [\|\eta(X, a) - \hat{\eta}(X, a)\|_1 \mid A = a] \\ &= \sum_{a=1}^M \frac{\pi_a}{\pi_a} \mathbf{E} [\|\eta(X, a) - \hat{\eta}(X, a)\|_1 \mid A = a] \\ &\leq \frac{1}{\pi_{\min}} \mathbf{E}_{X,A} [\|\eta(X, A) - \hat{\eta}(X, A)\|_1], \end{aligned}$$

where the third step follows from the definition of  $\hat{h}$  and the sixth step uses the fact that  $L_{ij}^a \in [0, 1]$ .  $\square$

The proof of Theorem 7 then follows from Lemma 9, Lemma 8, and standard convergence result for the Frank-Wolfe optimization solver for optimizing a convex objective [13]. The proof uses the fact that  $\mathcal{L}(C^1, \dots, C^M, \lambda)$  is Lipschitz w.r.t. the  $\ell_1$  norm with parameter  $G(1 + KB)$  and smooth w.r.t. the  $\ell_1$  norm with parameter  $\beta(1 + KB)$ .
